# Supplementary material for: Bridge nucleic acid/DNA gapmers as inhibitors of gene expression by multiple antisense mechanisms
Source: Research Square preprint supplement (doi:10.21203/rs.3.rs-7390173/v1), 2025-09-03

SUPPLEMENTARY MATERIALS

Bridge nucleic acid/DNA gapmers as inhibitors of gene expression by multiple antisense mechanisms

Angel J. Magaña, Kimberly Phan, Jesse Lopez, Maria S. Ramirez, Marcelo E. Tolmasky*

Center for Applied Biotechnology Studies, Department of Biological Science, College of Natural Sciences and Mathematics, California State University Fullerton, Fullerton, CA 92831, USA

**Full length/uncropped gels**

**Figure 3**

**RNase P** - RNAA


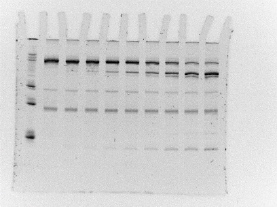


**RNase P** - LDAA


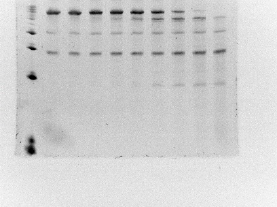


**Figure 3 continued**

**RNase P** – EDAA


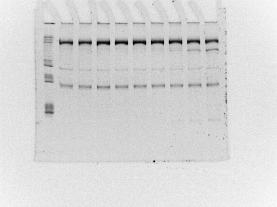


**RNase P** – BDAA


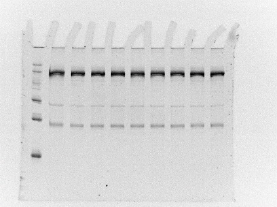


0 2 4 8 15 30 60 120 240

**Figure 3 continued**

**RNase P** – MDAA





**RNase H** – DNAA





**Figure 3 continued**

**RNase H** – LDAA


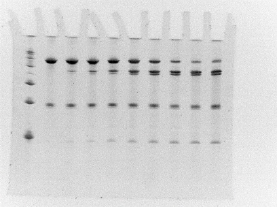


**RNase H** – EDAA





**Figure 3 continued**

**RNase H** – BDAA





**RNase H** – MDAA


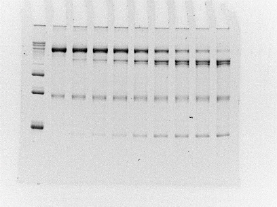


**Figure 4**

Panel A


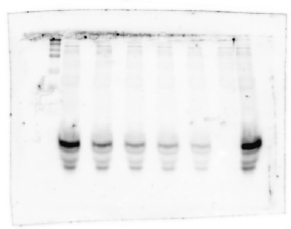


Panel B


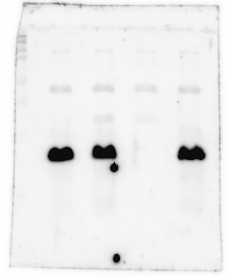


Panel C


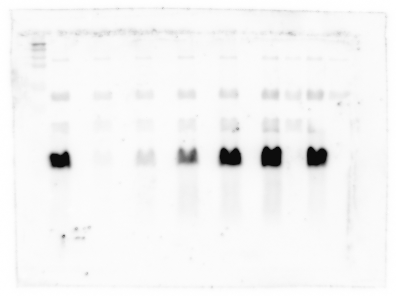

Supplement: Supplementary file 1 [file f366a9bd1540a8968a5e0dcb.docx]
